# Supplementary material for: A Cardiovascular Disease Prediction Model Based on Routine Physical Examination Indicators Using Machine Learning Methods: A Cohort Study
Source: PubMed Central journal article supplement (PMC9247206; doi:10.3389/fcvm.2022.854287), 2022-06-17
Supplement: Data_Sheet_1.pdf [file Data_Sheet_1.pdf]

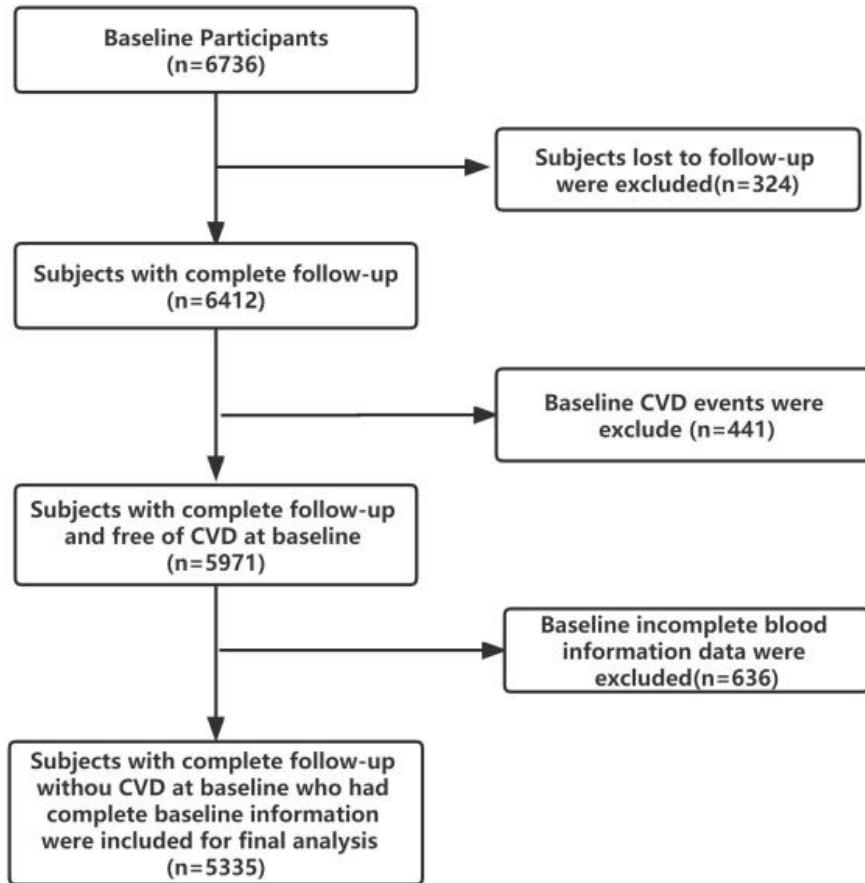

**Supplementary: Fig. 1.1** Flow diagram of subjects included of cohort 1.CVD, Cardiovascular Disease.

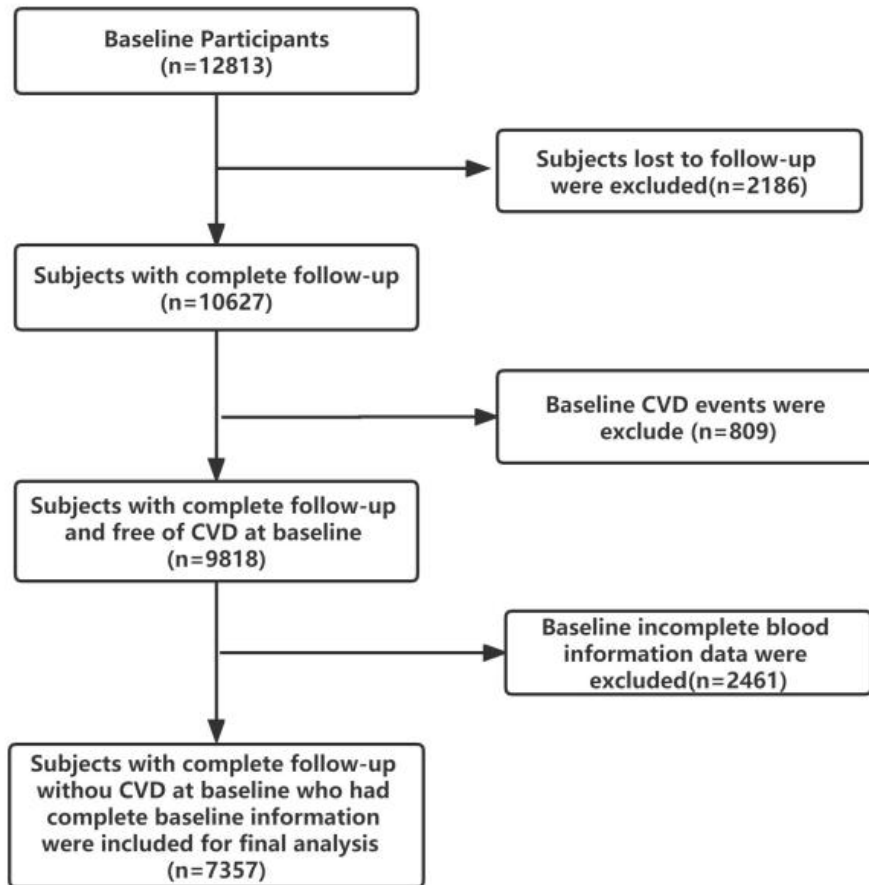

**Supplementary: Fig. 1.2** Flow diagram of subjects included of cohort 2.CVD, Cardiovascular Disease.

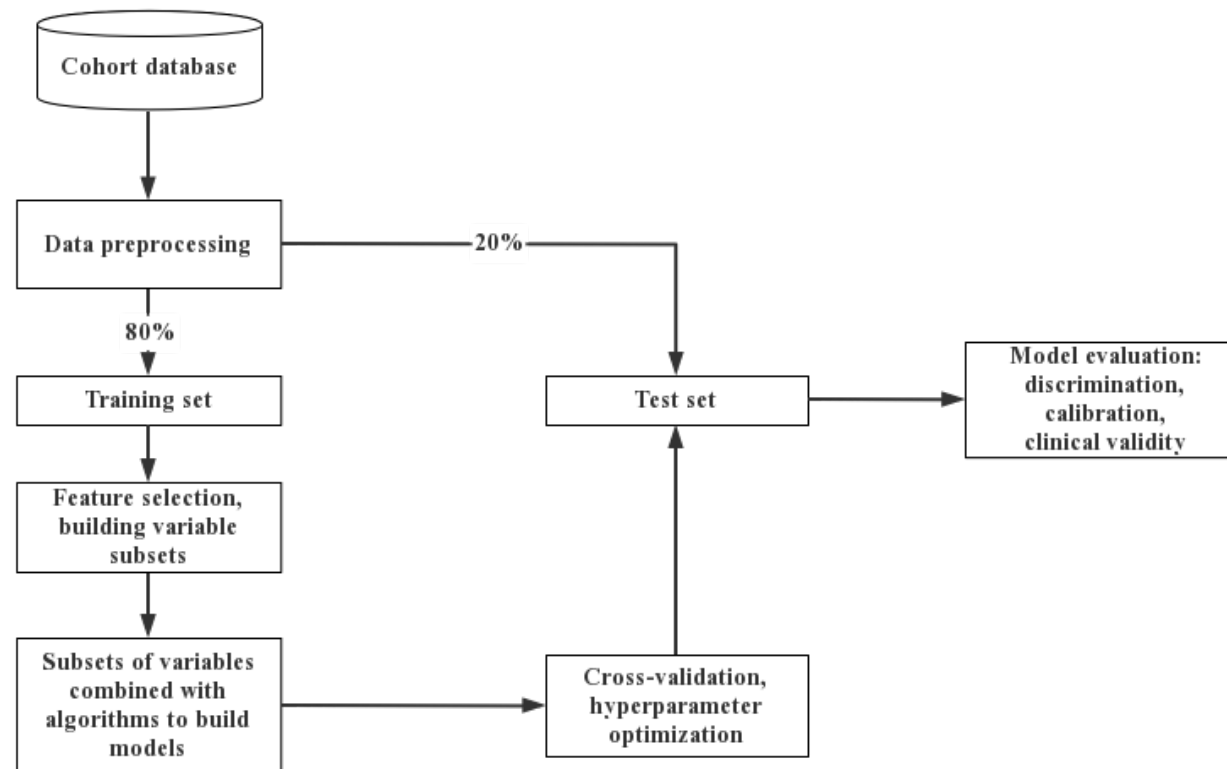

**Supplementary: Fig. 1.3** Flow diagram of the data analysis process in this study

The research database included demographic characteristics, physical examination findings, and serology results. There were 62 variables in total. After removing the missing ratio of  $\geq 50\%$  and 11 variables unrelated to the research, a total of 51 variables were included. Since there were a few variables with missing values Included in the analysis in this study, continuous variables were filled using the mean, while categorical variables were filled using the mode.

**Supplementary: Table 1** Missing variable descriptions

| Variable               | Missing ratio | Variable                                             | Missing ratio |
|------------------------|---------------|------------------------------------------------------|---------------|
| Education level        | 1.06%         | Self-assessment of the health status of the elderly  | 70.00%*       |
| Profession             | 2.00%         | Self-assessment of self-care ability of the elderly  | 70.00%*       |
| Waist circumference    | 1.19%         | Self-assessment of cognitive function in the elderly | 70.00%*       |
| Hip circumference      | 1.07%         | Self-assessment of emotional state of the elderly    | 70.00%*       |
| Height                 | 3.34%         | Type of drinking water                               | 65.00%*       |
| Weight                 | 2.78%         | Fuel type                                            | 65.00%*       |
| Exercise frequency     | 67.30%*       | Exercise type                                        | 67.30%*       |
| Each exercise time     | 67.30%*       | Exercise frequency                                   | 67.30%*       |
| Stick to exercise time | 67.30%*       | Kitchen exhaust facility                             | 51.00%*       |

Note: \*Missing values greater than 50% were not included in the analysis

Divide the data set into training set and test set according to 2:8, compare whether there is a difference between the count data between the CVD group and the non-CVD group on the training set and the test set. Two-sided test  $P < 0.05$ .

**Supplementary: Table 2.1** Comparison of research objects between training set and test set (counting data)

| Feature       | Training set      |              |                   | Test set          |              | <i>P value</i> |
|---------------|-------------------|--------------|-------------------|-------------------|--------------|----------------|
|               | Non-CVD<br>(9226) | CVD<br>(927) | <i>P</i><br>value | Non-CVD<br>(2290) | CVD<br>(249) |                |
| Age(years)    | 40.04±13.53       | 53.22±12.86  | <0.01             | 39.96±13.74       | 53.18±13.40  | <0.01          |
| Height(cm)    | 162.51±8.61       | 159.85±8.10  | <0.01             | 162.49±8.54       | 159.41±8.46  | <0.01          |
| Weight(Kg)    | 66.01±13.11       | 68.51±14.46  | <0.01             | 65.84±13.33       | 68.04±15.77  | 0.01           |
| WC(cm)        | 88.65±12.51       | 93.58±13.56  | <0.01             | 88.63±12.86       | 93.35±14.01  | <0.01          |
| HC(cm)        | 98.85±8.22        | 101.22±9.48  | <0.01             | 98.78±8.35        | 100.49±10.18 | <0.01          |
| FBG (mmol/L)  | 5.00±1.55         | 5.54±2.58    | <0.01             | 4.96±1.45         | 5.43±2.09    | <0.01          |
| TG (mmol/L)   | 1.56±1.28         | 1.76±1.47    | <0.01             | 1.57±1.38         | 1.84±1.48    | <0.01          |
| TC (mmol/L)   | 4.56±1.80         | 4.72±1.15    | <0.01             | 4.53±2.01         | 4.85±1.42    | 0.01           |
| HDL-C(mmol/L) | 1.43±0.56         | 1.36±0.48    | <0.01             | 1.43±0.63         | 1.37±0.46    | 0.11           |
| LDL-C(mmol/L) | 2.46±0.89         | 2.64±0.77    | <0.01             | 2.43±0.79         | 2.68±0.89    | <0.01          |
| SBP (mmHg)    | 127.13±19.63      | 145.13±26.88 | <0.01             | 126.58±12.42      | 145.66±27.10 | <0.01          |
| DBP (mmHg)    | 76.80±12.71       | 85.07±15.42  | <0.01             | 76.59±12.42       | 85.14±15.77  | <0.01          |
| ALT (mmol/L)  | 24.46±22.23       | 23.30±20.53  | 0.13              | 24.47±21.32       | 21.84±14.24  | 0.06           |
| AST (mmol/L)  | 24.80±15.41       | 25.73±13.46  | 0.08              | 24.83±16.68       | 25.18±10.61  | 0.74           |

|                         |              |               |       |              |                   |       |
|-------------------------|--------------|---------------|-------|--------------|-------------------|-------|
| TP (mmol/L)             | 74.02±9.24   | 73.52±11.25   | 0.13  | 73.70±9.76   | 74.07±11.04       | 0.58  |
| ALB(g/L)                | 76.75±76.54  | 96.64±96.70   | <0.01 | 75.95±75.32  | 100.23±98.03      | <0.01 |
| GLO(g/L)                | 29.77±5.05   | 30.74±5.56    | <0.01 | 29.65±5.26   | 30.76±5.26        | <0.01 |
| TB(umol/L)              | 10.53±6.09   | 10.74±7.00    | 0.32  | 10.31±6.11   | 10.38±5.82        | 0.85  |
| DB(umol/L)              | 3.78±2.47    | 3.63±2.11     | 0.06  | 3.67±2.30    | 3.76±4.12         | 0.60  |
| ALP(U/L)                | 78.31±30.76  | 81.22±26.77   | <0.01 | 77.78±28.23  | 85.34±32.36       | <0.01 |
| GGT(U/L)                | 19.22±19.92  | 20.76±15.83   | 0.02  | 18.67±15.38  | 23.38±24.67       | <0.01 |
| CR(umol/L)              | 66.43±16.50  | 66.64±20.37   | 0.71  | 66.35±16.92  | 66.01±17.22       | 0.77  |
| AOPAB(g/L)              | 1.39±0.85    | 1.34±1.11     | <0.01 | 1.39±0.61    | 1.33±0.55         | 0.10  |
| AOPB(g/L)               | 0.92±0.85    | 1.34±1.10     | <0.01 | 0.91±0.26    | 0.98±0.31         | <0.01 |
| HBDH(U/L)               | 146.31±56.84 | 150.08±61.11  | 0.06  | 146.08±55.11 | 153.16±84.50      | 0.07  |
| LDH(U/L)                | 173.31±59.47 | 179.67±68.04  | <0.01 | 173.94±59.03 | 188.49±<br>102.52 | <0.01 |
| SD(mmHg)                | 50.32±14.83  | 60.07±19.90   | <0.01 | 49.83±14.54  | 60.52±18.46       | <0.01 |
| WHR                     | 0.89±0.09    | 0.92±0.10     | <0.01 | 0.89±0.09    | 0.93±0.11         | <0.01 |
| BMI(Kg/m <sup>2</sup> ) | 24.95±4.40   | 26.78±5.22    | <0.01 | 24.90±4.53   | 26.65±5.37        | <0.01 |
| aUA(umol/L)             | 284.60±87.44 | 294.59±117.64 | <0.01 | 284.65±85.74 | 297.59±94.56      | 0.03  |
| TyG                     | 4.69±4.57    | 5.64±7.41     | <0.01 | 4.64±3.81    | 5.70±5.46         | <0.01 |
| LAP                     | 72.35±75.88  | 82.17±80.62   | <0.01 | 71.24±77.43  | 85.83±87.65       | <0.01 |
| BAI                     | 29.91±5.09   | 32.30±5.92    | <0.01 | 29.88±5.06   | 32.07±5.56        | <0.01 |
| LCI                     | 16.16±49.85  | 19.98±24.60   | 0.02  | 15.55±21.38  | 22.30±27.17       | <0.01 |
| AI                      | 2.51±2.85    | 2.81±2.72     | <0.01 | 2.48±2.09    | 2.81±1.32         | 0.02  |

|     |            |           |       |            |           |       |
|-----|------------|-----------|-------|------------|-----------|-------|
| AIP | -0.03±0.33 | 0.05±0.31 | <0.01 | -0.03±0.32 | 0.05±0.35 | <0.01 |
| LpH | 1.92±1.36  | 2.18±1.82 | <0.01 | 1.90±1.00  | 2.14±0.92 | <0.01 |
| THT | 0.70±0.50  | 0.73±0.49 | 0.04  | 0.71±0.57  | 0.75±0.53 | 0.04  |

**Abbreviations:** continuous variables are expressed as mean ± standard deviation, CVD, cardiovascular disease; WC, waist circumference; HC, hip circumference; FBG, fasting blood glucose; TG, triglycerides; TC, total cholesterol; HDL-C, high-density lipoprotein cholesterol; LDL-C, low-density lipoprotein cholesterol; SBP, systolic blood pressure; DBP, diastolic blood pressure; ALT, alanine aminotransferase; AST, aspartate aminotransferase; TP, total protein; ALB, albumin; GLO, globulin; TB, total bilirubin; DB, direct bilirubin; ALP, alkaline phosphatase; GGT,  $\gamma$ -glutamyltransferase; CR, creatinine; APOAB, apolipoprotein AB; APOB, apolipoprotein B; HBDH,  $\alpha$ -hydroxybutyrate dehydrogenase; LDH, lactate dehydrogenase; SD, pulse pressure difference ; WHR, waist-to-height ratio, BMI, body mass index; aUA, uric acid; TyG, triglyceride blood glucose index; LAP, fat accumulation product index; BAI, body obesity index; LCI, blood lipid index; AI, arteriosclerosis index; AIP, plasma arteriosclerosis index; LpH, low-high-density lipoprotein ratio; THT, bilirubin comprehensive index.

Divide the data set into training set and test set according to 2:8, compare whether there is a difference between the count data between the CVD group and the non-CVD group on the training set and the test set. Two-sided test  $P < 0.05$ .

**Supplementary: Table 2.2** Comparison of research objects between training set and test set (measurement data)

| Feature   |     | Training set      |              |                | Test set          |              |                |
|-----------|-----|-------------------|--------------|----------------|-------------------|--------------|----------------|
|           |     | Non-CVD<br>(9226) | CVD<br>(927) | <i>P</i> value | Non-CVD<br>(2290) | CVD<br>(249) | <i>P</i> value |
| FHDM,n(%) | No  | 8,934(96.8)       | 910(98.2)    | 0.03           | 2,228(97.2)       | 241(96.8)    | 0.64           |
|           | Yes | 292(3.2)          | 17(1.8)      |                | 62(2.8)           | 8(3.2)       |                |

|                      |                         |             |           |       |             |           |       |
|----------------------|-------------------------|-------------|-----------|-------|-------------|-----------|-------|
| Fhstroke,n(%)        | No                      | 8,904(96.5) | 897(96.8) | 0.69  | 2,205(96.3) | 240(96.4) | 0.93  |
|                      | Yes                     | 322(3.5)    | 30(3.2)   |       | 85(3.7)     | 9(3.6)    |       |
| Fhchd,n(%)           | No                      | 8,969(97.2) | 893(96.3) | 0.13  | 2,232(94.5) | 242(97.2) | 0.79  |
|                      | Yes                     | 257(2.8)    | 34(3.7)   |       | 58(5.5)     | 7(2.8)    |       |
| Dm,n(%)              | No                      | 8,837(95.8) | 832(89.8) | <0.01 | 2,193(95.8) | 221(88.8) | <0.01 |
|                      | Yes                     | 389(4.2)    | 95(10.2)  |       | 97(4.2)     | 28(11.2)  |       |
| Hypertension,n(%)    | No                      | 6,159(66.8) | 321(34.6) | <0.01 | 1,559(68.1) | 91(36.5)  | <0.01 |
|                      | Yes                     | 3,067(33.2) | 606(65.4) |       | 731(31.9)   | 158(63.5) |       |
| Sex,n(%)             | Male                    | 4,708(51.0) | 352(38.0) | <0.01 | 1,149(50.2) | 85(34.1)  | <0.01 |
|                      | Female                  | 4,518(49.0) | 575(62.0) |       | 1,141(49.8) | 164(65.9) |       |
| Nationality,n(%)     | Kazakh                  | 1,577(17.1) | 251(27.1) | <0.01 | 385(16.8)   | 72(28.9)  | <0.01 |
|                      | Uyghr                   | 7,649(82.9) | 676(72.9) |       | 1,905(83.2) | 177(71.1) |       |
| Profession,n(%)      | Agriculture             | 5,007(54.3) | 521(56.2) | <0.01 | 1,208(52.8) | 125(50.2) | <0.01 |
|                      | Animal husbandry        | 2,577(27.9) | 214(23.1) |       | 675(29.5)   | 59(23.7)  |       |
|                      | General staff           | 411(4.4)    | 29(3.1)   |       | 109(4.8)    | 15(6.1)   |       |
|                      | Housework or retirement | 468(5.1)    | 83(9.0)   |       | 119(5.2)    | 25(10.0)  |       |
|                      | Other                   | 763(8.3)    | 80(8.6)   |       | 179(7.7)    | 25(10.0)  |       |
| Education level,n(%) | Illiteracy              | 2,681(29.1) | 367(39.6) | <0.01 | 640(27.9)   | 89(35.7)  | <0.01 |
|                      | Primary school          | 3,212(34.8) | 365(39.4) |       | 835(36.5)   | 100(40.2) |       |
|                      | Junior high school      | 2,619(28.3) | 145(15.6) |       | 636(27.7)   | 37(14.9)  |       |
|                      | High school             | 457(5.0)    | 36(3.9)   |       | 102(4.5)    | 10(4.0)   |       |



|                     |                          |             |           |       |             |           |       |
|---------------------|--------------------------|-------------|-----------|-------|-------------|-----------|-------|
|                     | College degree and above | 257(2.8)    | 14(1.5)   |       | 77(3.4)     | 13(5.2)   |       |
| Marital status,n(%) | Married                  | 7,984(86.5) | 795(85.8) | <0.01 | 2,013(87.9) | 200(80.3) | <0.01 |
|                     | Unmarried                | 654(7.1)    | 13(1.4)   |       | 153(6.7)    | 5(2.0)    |       |
|                     | Live alone               | 588(6.4)    | 119(12.8) |       | 124(5.4)    | 44(17.7)  |       |
| Smoking,n(%)        | Not smoke                | 7,453(80.8) | 765(82.5) | 0.20  | 1,863(81.4) | 204(81.9) | 0.83  |
|                     | Smoking                  | 1,773(19.2) | 162(17.5) |       | 427(18.6)   | 45(18.1)  |       |
| Drinking,n(%)       | No alcohol               | 8,621(93.4) | 897(96.8) | 0.02  | 2,193(95.8) | 239(96.0) | 0.87  |
|                     | Drinking                 | 605(6.6)    | 30(3.2)   |       | 97(4.2)     | 10(4.0)   |       |
| BPcate,n(%)         | Normal blood pressure    | 4,472(48.5) | 217(23.4) | <0.01 | 1,155(50.5) | 60(24.1)  | <0.01 |
|                     | Prehypertension          | 2,253(24.4) | 171(18.4) |       | 566(24.7)   | 42(16.9)  |       |
|                     | Hypertension             | 2,501(27.1) | 539(58.2) |       | 569(24.8)   | 147(59.0) |       |

**Abbreviations:** Measurement data are expressed as n(%); FHDM, Family history of diabetes; Fhstroke, Family history of stroke; Fhchd, Family history of coronary heart disease; Dm, diabetes mellitus; BPcate, Blood Pressure classification.

**Supplementary: Table 3** Screening variable subsets based on Logistic regression forward partial likelihood estimation method

| Variable | Variable type  | Variable | Variable type |
|----------|----------------|----------|---------------|
| DM       | Classification | APOB     | Continuous    |
| Minority | Classification | HBDH     | Continuous    |
| Sex      | Classification | LDH      | Continuous    |
| Career   | Classification | SD       | Continuous    |
| Marriage | Classification | BMI      | Continuous    |
| Age      | Continuous     | aUA      | Continuous    |
| Height   | Continuous     | TyG      | Continuous    |
| Hipline  | Continuous     | BAI      | Continuous    |
| HDL-C    | Continuous     | AI       | Continuous    |
| DBP      | Continuous     | LpH      | Continuous    |
| TP       | Continuous     | TB       | Continuous    |

**Abbreviations:**DM,diabetes mellitus; HDL-C,high-density lipoprotein cholesterol; DBP,diastolic blood pressure; TP, total protein; APOB apolipoprotein B; HBDH,  $\alpha$ -hydroxybutyrate dehydrogenase; LDH, lactate dehydrogenase; SD, pulse pressure difference; BMI, body mass index; aUA, uric acid; TyG, triglyceride blood glucose index; BAI, body obesity index; AI, arteriosclerosis index; LpH, low-high-density lipoprotein ratio; TB, total bilirubin.

Based on logistic regression algorithm forward biased likelihood estimation method (FLR) and Lasso regression and Random forest (RF) feature importance (CI), permutation importance (PI) method to screen variables, and the selected variables Create a subset of variables, see Table 3-6.

**Supplementary: Table 4** Filter subsets of variables based on Lasso-Logistic regression

| Variable | Variable type  | Variable     | Variable type  |
|----------|----------------|--------------|----------------|
| Age      | Continuous     | BMI          | Continuous     |
| Sex      | Classification | HDL-C        | Continuous     |
| Minority | Classification | APOB         | Continuous     |
| Marriage | Classification | TP           | Continuous     |
| SBP      | Classification | AIP          | Continuous     |
| Career   | Classification | TC           | Continuous     |
| LpH      | Continuous     | Smoking      | Classification |
| DM       | Classification | DB           | Continuous     |
| fhchd    | Classification | Hipline      | Continuous     |
| AI       | Continuous     | TB           | Continuous     |
| LCI      | Continuous     | Hypertension | Classification |
| FBG      | Continuous     | WHR          | Continuous     |
| AST      | Continuous     | TyG          | Continuous     |
| APOAB    | Continuous     | TG           | Continuous     |
| DBP      | Continuous     | aUA          | Continuous     |
| ALP      | Continuous     | LDH          | Continuous     |

HBDH                                                  Continuous                                                  GGT                                                  Continuous

**Abbreviations:**SBP, systolic blood pressure; LpH, low-high-density lipoprotein ratio;DM,diabetes mellitus; Fhchd, Family history of coronary heart disease; AI, arteriosclerosis index; LCI, blood lipid index; FBG, fasting blood glucose; AST, aspartate aminotransferase; APOAB, apolipoprotein AB; DBP, diastolic blood pressure; ALP, alkaline phosphatase; HBDH,  $\alpha$ -hydroxybutyrate dehydrogenase; BMI, body mass index; HDL-C, high-density lipoprotein cholesterol; APOB apolipoprotein B; TP, total protein; AIP, Plasma arteriosclerosis index; TC, total cholesterol; DB, Direct Bilirubin; TB, total bilirubin; WHR, waist-to-height ratio; TyG, triglyceride blood glucose index;aUA, uric acid; LDH, lactate dehydrogenase; GGT,  $\gamma$ -glutaminase.

**Supplementary: Table 5** Filtering subsets of variables based on the importance of features of random forest

| Variable     | Variable type  | Variable | Variable type |
|--------------|----------------|----------|---------------|
| Age          | Continuous     | TC       | Continuous    |
| SBP          | Continuous     | HDL-C    | Continuous    |
| Hypertension | Classification | TB       | Continuous    |
| BPcate       | Classification | aUA      | Continuous    |
| ALB          | Continuous     | LDL-C    | Continuous    |
| SD           | Continuous     | AIP      | Continuous    |
| DBP          | Continuous     | TP       | Continuous    |
| FBG          | Continuous     | LAP      | Continuous    |
| LpH          | Continuous     | GGT      | Continuous    |
| BMI          | Continuous     | AST      | Continuous    |

|        |            |      |            |
|--------|------------|------|------------|
| CR     | Continuous | HBDH | Continuous |
| Height | Continuous | LCI  | Continuous |
| TyG    | Continuous | LDH  | Continuous |
| WHR    | Continuous | ALP  | Continuous |
| ALT    | Continuous | DB   | Continuous |
| GLO    | Continuous | AI   | Continuous |
| THT    | Continuous | APOB | Continuous |
| BAI    | Continuous |      |            |

---

**Abbreviations:** SBP, systolic blood pressure; BPcate, blood pressure classification; ALB, albumin; SD, pulse pressure difference; DBP, diastolic blood pressure; FBG, fasting blood glucose; LpH, low-high-density lipoprotein ratio; BMI, body mass index; CR, creatinine; TyG, triglyceride blood glucose index; WHR, waist-to-height ratio; ALT, alanine aminotransferase; GLO, globulin; THT, bilirubin comprehensive index; BAI, body obesity index; TC, total cholesterol; HDL-C, high-density lipoprotein cholesterol; TB, total bilirubin; aUA, uric acid; LDL-C, low-density lipoprotein cholesterol; AIP, Plasma arteriosclerosis index; TP, total protein; LAP, fat accumulation product index; GGT,  $\gamma$ -glutaminase; AST, aspartate aminotransferase; HBDH,  $\alpha$ -hydroxybutyrate dehydrogenase; LCI, blood lipid index; LDH, lactate dehydrogenase; ALP, alkaline phosphatase; DB, direct bilirubin; AI, arteriosclerosis index; APOB apolipoprotein B.

**Supplementary: Table 6** Selection of variable subsets based on random forest's ranking importance

| Variable | Variable type | Variable | Variable type  |
|----------|---------------|----------|----------------|
| HBDH     | Continuous    | GLO      | Continuous     |
| SD       | Continuous    | ALP      | Continuous     |
| LDH      | Continuous    | THT      | Continuous     |
| aUA      | Continuous    | AI       | Continuous     |
| BMI      | Continuous    | FHDM     | Classification |
| LCI      | Continuous    | fhstroke | Classification |
| WHR      | Continuous    | fhchd    | Classification |
| BAI      | Continuous    | Minority | Classification |
| TyG      | Continuous    | Sex      | Classification |
| LAP      | Continuous    | Career   | Classification |
| GGT      | Continuous    | Height   | Continuous     |
| TB       | Continuous    | AIP      | Continuous     |
| DB       | Continuous    | ALB      | Continuous     |
| AST      | Continuous    | CR       | Continuous     |
| APOB     | Continuous    | APOAB    | Continuous     |

**Abbreviations:** HBDH,  $\alpha$ -hydroxybutyrate dehydrogenase; SD, pulse pressure difference; LDH, lactate dehydrogenase; aUA, uric acid; BMI, body mass index;; LCI, blood lipid index;; WHR, waist-to-height ratio; BAI, body obesity index;TyG, triglyceride blood glucose index; LAP, fat accumulation product index; GGT,  $\gamma$ -glutaminase; TB, total bilirubin; DB, Direct Bilirubin; AST, aspartate aminotransferase;APOB apolipoprotein B; GLO, globulin; ALP, alkaline phosphatase; THT, bilirubin comprehensive index; AI,

---

arteriosclerosis index; FHDM, Family history of diabetes; Fhstroke, Family history of stroke; Fhchd, Family history of coronary heart disease; AIP, Plasma arteriosclerosis index; CR, creatinine; APOAB, apolipoprotein AB.

Based on Logistic regression algorithm forward biased likelihood estimation method (FLR) and Lasso regression and random forest (RF) characteristic importance (CI) and permutation importance (PI) methods to screen variables. Use the filtered variables to create a subset of variables. Combine the selected variable subset and the full variable subset with the Adaboost algorithm to establish a prediction model. The parameter values of the model are shown in Table 7.1

**Supplementary: Table 7.1** Hyperparameter values of the Adaboost model under different variable subsets

| Model | Parameter categories |              |
|-------|----------------------|--------------|
|       | learning_rate        | n_estimators |
| Lasso | 0.016                | 223          |
| CI    | 0.062                | 869          |
| PI    | 0.066                | 165          |
| FLR   | 0.066                | 868          |
| All   | 0.131                | 868          |

Based on Logistic regression algorithm forward biased likelihood estimation method (FLR) and Lasso regression and random forest (RF) characteristic importance (CI) and permutation importance (PI) methods to screen variables .Use the filtered variables to create a subset of variables.Combine the selected variable subset and the full variable subset with the support vector machine (SVM) algorithm to establish a prediction model.The parameter values of the model are shown in Table 7.2.

**Supplementary: Table 7.2** Hyperparameter values of the SVM model under different variable subsets

| Model | Parameter categories |        |        |
|-------|----------------------|--------|--------|
|       | C                    | gamma  | kernel |
| Lasso | 10                   | 0.001  | rbf    |
| CI    | 1                    | 0.001  | rbf    |
| PI    | 10                   | 0.001  | rbf    |
| FLR   | 10                   | -      | linear |
| ALL   | 100                  | 0.0001 | rbf    |



Based on Logistic regression algorithm forward biased likelihood estimation method (FLR) and Lasso regression and random forest (RF) characteristic importance (CI) and permutation importance (PI) methods to screen variables .Use the filtered variables to create a subset of variables.Combine the selected variable subset and the full variable subset with the support vector machine (SVM) algorithm to establish a prediction model.The parameter values of the model are shown in Table 7.3.

**Supplementary: Table7.3** Hyperparameter values of the RF model under different variable subsets

| Model | Parameter categories |              |                  |                   |              |
|-------|----------------------|--------------|------------------|-------------------|--------------|
|       | max_depth            | max_features | min_samples_leaf | min_samples_split | n_estimators |
| Lasso | 8                    | 0.45         | 11               | 12                | 299          |
| CI    | 12                   | 0.33         | 19               | 16                | 235          |
| PI    | 14                   | 0.29         | 11               | 12                | 462          |
| FLR   | 9                    | 0.37         | 11               | 15                | 298          |
| ALL   | 10                   | 0.37         | 15               | 16                | 298          |

Based on Logistic regression algorithm forward biased likelihood estimation method (FLR) and Lasso regression and random forest (RF) characteristic importance (CI) and permutation importance (PI) methods to screen variables .Use the filtered variables to create a subset of variables.Combine the selected variable subset and the full variable subset with the L1 regularised logistic regression (L1-LR) algorithm to establish a prediction model.The parameter values of the model are shown in Table 7.5.

**Supplementary: Table7.4** Hyperparameter values of the F1-LR model under different variable subsets

| Model | Parameter categories |
|-------|----------------------|
|       | C                    |
| lasso | 0.100                |
| CI    | 0.001                |
| PI    | 1.000                |
| FLR   | 0.100                |
| ALL   | 0.100                |

Based on Logistic regression algorithm forward biased likelihood estimation method (FLR) and Lasso regression and random forest (RF) characteristic importance (CI) and permutation importance (PI) methods to screen variables. Use the filtered variables to create a subset of variables. Combine the selected variable subset and the full variable subset with L1 regularised logistic regression (L1-LR), random forest (RF), support vector machine (SVM), and Adaboost algorithm to establish a prediction model, Area Under Curve (AUC) values of different models on training and test sets see Table 8 for details.

**Supplementary: Table 8** AUC values of different models on training and test sets

| Model          | AUC           |           | Model     | AUC           |           |
|----------------|---------------|-----------|-----------|---------------|-----------|
|                | Training sets | Test sets |           | Training sets | Test sets |
| Lasso-L1-LR    | 0.805         | 0.810     | lasso-SVM | 0.804         | 0.810     |
| CI-L1-LR       | 0.796         | 0.801     | CI-SVM    | 0.794         | 0.802     |
| PI-L1-LR       | 0.731         | 0.742     | PI-SVM    | 0.731         | 0.775     |
| FLR-L1-LR      | 0.807         | 0.817     | FLR-SVM   | 0.806         | 0.814     |
| ALL-L1-LR      | 0.806         | 0.811     | ALL-SVM   | 0.800         | 0.804     |
| Lasso-Adaboost | 0.793         | 0.798     | lasso-RF  | 0.800         | 0.803     |
| CI-Adaboost    | 0.749         | 0.796     | CI-RF     | 0.800         | 0.805     |
| PI-Adaboost    | 0.728         | 0.750     | PI-RF     | 0.740         | 0.763     |
| FLR-Adaboost   | 0.790         | 0.798     | FLR-RF    | 0.802         | 0.804     |
| ALL-Adaboost   | 0.785         | 0.805     | ALL-RF    | 0.802         | 0.803     |

Based on Logistic regression algorithm forward biased likelihood estimation method (FLR) and Lasso regression and random forest (RF) characteristic importance (CI) and permutation importance (PI) methods to screen variables .Use the filtered variables to create a subset of variables.Combine the selected variable subset and the full variable subset with the Adaboost algorithm to establish a prediction model, and select the optimal prediction model of the algorithm by comprehensively comparing the degree of discrimination and calibration between the models. See Table 9.1 for details.The optimal prediction model of the Adaboost algorithm is established based on the subset of variables selected by Lasso.

**Supplementary: Table 9.1** Comparison of prediction performance of different variable subsets based on Adaboost algorithm

|       | AUC                | Youden Index | Optimal threshold | Sensitivity(%) | Specificity (%) | PPV(%) | NPV(%) | Proportion of high-risk population(%) | Brier Score        | Homser-Le meshow $\chi^2$ | P Value |
|-------|--------------------|--------------|-------------------|----------------|-----------------|--------|--------|---------------------------------------|--------------------|---------------------------|---------|
| CI    | 0.796(0.780,0.811) | 0.482        | 0.09              | 77.11          | 71.14           | 22.5   | 96.6   | 34.5                                  | 0.078(0.071,0.086) | 26.61                     | <0.01   |
| FLR   | 0.798(0.782,0.814) | 0.503        | 0.09              | 82.73          | 67.55           | 21.7   | 97.3   | 37.4                                  | 0.078(0.070,0.085) | 29.83                     | <0.01   |
| PI    | 0.750(0.733,0.767) | 0.382        | 0.09              | 67.47          | 70.74           | 20.0   | 95.2   | 31.6                                  | 0.082(0.074,0.091) | 23.20                     | <0.01   |
| Lasso | 0.798(0.782,0.813) | 0.472        | 0.11              | 73.09          | 74.10           | 23.5   | 96.2   | 30.4                                  | 0.078(0.070,0.086) | 13.81                     | 0.09    |
| all   | 0.805(0.789,0.820) | 0.519        | 0.11              | 74.30          | 77.55           | 26.5   | 96.5   | 29.1                                  | 0.078(0.070,0.086) | 23.52                     | <0.01   |

**Abbreviations:**AUC,area under the receiver operating characteristic curve; PPV,positive predictive value; NPV,negative predictive value;FLR,forward biased likelihood estimation;CI,characteristic importance;PI,permutation importance

Based on Logistic regression algorithm forward biased likelihood estimation method (FLR) and Lasso regression and random forest (RF) characteristic importance (CI) and permutation importance (PI) methods to screen variables .Use the filtered variables to create a subset of variables.Combine the selected variable subset and the full variable subset with the Logistic regression algorithm to establish a prediction model, and select the optimal prediction model of the algorithm by comprehensively comparing the degree of discrimination and calibration between the models. See Table 9.2 for details.The optimal prediction model of the LR algorithm is established based on the subset of variables selected by Logistic regression forward biased likelihood estimation method.

**Supplementary: Table 9.2** Comparison of prediction performance of different variable subsets based on L1-LR algorithm

|       | AUC                | Youden Index | Optimal threshold | Sensitivity(%) | Specificity (%) | PPV(%) | NPV(%) | Proportion of high-risk population(%) | Brier Score        | Homser-Lemeshow $\chi^2$ | <i>P</i> Value |
|-------|--------------------|--------------|-------------------|----------------|-----------------|--------|--------|---------------------------------------|--------------------|--------------------------|----------------|
| CI    | 0.801(0.785,0.816) | 0.477        | 0.09              | 73.09          | 74.63           | 23.9   | 96.2   | 31.5                                  | 0.078(0.070,0.086) | 10.14                    | 0.26           |
| FLR   | 0.817(0.801,0.832) | 0.524        | 0.11              | 73.49          | 78.86           | 27.4   | 96.5   | 26.7                                  | 0.076(0.069,0.084) | 11.51                    | 0.17           |
| PI    | 0.742(0.725,0.759) | 0.361        | 0.08              | 74.70          | 61.35           | 17.4   | 95.7   | 41.2                                  | 0.081(0.073,0.090) | 10.09                    | 0.26           |
| Lasso | 0.810(0.794,0.825) | 0.489        | 0.08              | 79.92          | 69.00           | 21.9   | 96.9   | 36.0                                  | 0.077(0.069,0.085) | 10.64                    | 0.22           |
| all   | 0.811(0.801,0.832) | 0.493        | 0.09              | 77.91          | 71.44           | 22.9   | 96.7   | 32.5                                  | 0.077(0.069,0.085) | 11.35                    | 0.18           |

**Abbreviations:**L1-LR,L1 regularised logistic regression;AUC,area under the receiver operating characteristic curve; PPV,positive predictive value; NPV,negative predictive value;FLR,forward biased likelihood estimation;CI,characteristic importance;PI,permutation importance

Based on Logistic regression algorithm forward biased likelihood estimation method (FLR) and Lasso regression and random forest (RF) feature importance (CI) and permutation importance (PI) methods to screen variables. Use the filtered variables to create a subset of variables. Combine the selected variable subset and the full variable subset with the RF algorithm to establish a prediction model, and select the optimal prediction model of the algorithm by comprehensively comparing the degree of discrimination and calibration between the models. See Table 9.3 for details. The optimal prediction model of the RF algorithm is established based on the subset of variables selected by Logistic regression forward biased likelihood estimation method.

**Supplementary: Table 9.3** Comparison of prediction performance of different variable subsets based on RF algorithm

|       | AUC                | Youden Index | Optimal threshold | Sensitivity(%) | Specificity (%) | PPV(%) | NPV(%) | Proportion of high-risk population(%) | Brier Score        | Homser-Le meshow $\chi^2$ | <i>P</i> Value |
|-------|--------------------|--------------|-------------------|----------------|-----------------|--------|--------|---------------------------------------|--------------------|---------------------------|----------------|
| CI    | 0.805(0.789,0.820) | 0.496        | 0.09              | 73.90          | 75.68           | 24.8   | 96.4   | 28.9                                  | 0.077(0.070,0.086) | 22.81                     | <0.01          |
| FLR   | 0.804(0.788,0.820) | 0.506        | 0.08              | 79.52          | 71.09           | 23.0   | 97.0   | 33.1                                  | 0.077(0.070,0.086) | 11.59                     | 0.17           |
| PI    | 0.763(0.746,0.779) | 0.413        | 0.08              | 75.90          | 65.41           | 19.2   | 96.0   | 35.9                                  | 0.081(0.073,0.090) | 32.75                     | <0.01          |
| Lasso | 0.803(0.787,0.818) | 0.482        | 0.08              | 75.90          | 72.31           | 23.0   | 96.5   | 32.5                                  | 0.076(0.069,0.085) | 11.33                     | 0.18           |
| all   | 0.803(0.787,0.818) | 0.498        | 0.08              | 75.10          | 74.72           | 24.4   | 96.5   | 30.8                                  | 0.079(0.071,0.088) | 34.44                     | <0.01          |

**NAbbreviations:** AUC, area under the receiver operating characteristic curve; PPV, positive predictive value; NPV, negative predictive value; FLR, forward biased likelihood estimation; CI, characteristic importance; PI, permutation importance

Based on Logistic regression algorithm forward biased likelihood estimation method (FLR) and Lasso regression and random forest (RF) feature importance (CI) and permutation importance (PI) methods to screen variables. Use the filtered variables to create a subset of variables. Combine the selected variable subset and the full variable subset with the Support vector machine (SVM) algorithm to establish a prediction model, and select the optimal prediction model of the algorithm by comprehensively comparing the degree of discrimination and calibration between the models. See Table 9.4 for details. The optimal prediction model of the SVM algorithm is established based on the subset of variables selected by Logistic regression forward biased likelihood estimation method.

**Supplementary: Table 9.4** Comparison of prediction performance of different variable subsets based on SVM algorithm

|       | AUC                | Youden Index | Optimal threshold | Sensitivity(%) | Specificity (%) | PPV(%) | NPV(%) | Proportion of high-risk population(%) | Brier Score        | Homser-Le meshow $\chi^2$ | P Value |
|-------|--------------------|--------------|-------------------|----------------|-----------------|--------|--------|---------------------------------------|--------------------|---------------------------|---------|
| CI    | 0.802(0.786,0.817) | 0.483        | 0.09              | 76.31          | 72.01           | 22.9   | 96.5   | 32.3                                  | 0.077(0.069,0.086) | 14.97                     | 0.06    |
| FLR   | 0.814(0.798,0.829) | 0.511        | 0.11              | 73.90          | 77.16           | 26.0   | 96.5   | 38.4                                  | 0.076(0.069,0.084) | 16.10                     | 0.04    |
| PI    | 0.755(0.738,0.771) | 0.371        | 0.09              | 69.08          | 67.99           | 19.0   | 95.3   | 34.8                                  | 0.081(0.072,0.089) | 13.04                     | 0.11    |
| Lasso | 0.810(0.794,0.825) | 0.487        | 0.09              | 77.91          | 70.79           | 22.5   | 96.7   | 32.8                                  | 0.077(0.069,0.085) | 11.53                     | 0.17    |
| all   | 0.804(0.788,0.820) | 0.481        | 0.09              | 75.10          | 73.01           | 23.2   | 96.4   | 32.3                                  | 0.077(0.070,0.085) | 8.16                      | 0.42    |

**Abbreviations:** AUC, area under the receiver operating characteristic curve; PPV, positive predictive value; NPV, negative predictive value; FLR, forward biased likelihood estimation; CI, characteristic importance; PI, permutation importance
